# Supplementary material
Source: PubMed Central journal article supplement (PMC5726797)
Supplement: NIHMS906251-supplement-1.pdf [file NIHMS906251-supplement-1.pdf]

| library control DNA |                |       |
|---------------------|----------------|-------|
| gene                | variant        | VAF   |
| <i>BRAF</i>         | p.V600E        | 8.56  |
| <i>EGFR</i>         | p.E746_A750del | 1.30  |
| <i>EGFR</i>         | p.L858R        | 2.21  |
| <i>EGFR</i>         | p.G719S        | 28.50 |
| <i>KIT</i>          | p.D816V        | 9.33  |
| <i>KRAS</i>         | p.G12D         | 5.95  |
| <i>KRAS</i>         | p.G13D         | 16.69 |
| <i>NRAS</i>         | p.Q61K         | 12.78 |
| <i>PIK3CA</i>       | p.E545K        | 8.46  |
| <i>PIK3CA</i>       | p.H1047R       | 16.36 |

VAF: variant allele frequency
